# Supplementary material
Source: MDPI journal article supplement (https://www.mdpi.com/2072-4292/15/2/452)
Supplement: s1 [file s1 › remotesensing-2106981-supplementary.pdf]

## Maps of the other two conservation gap areas

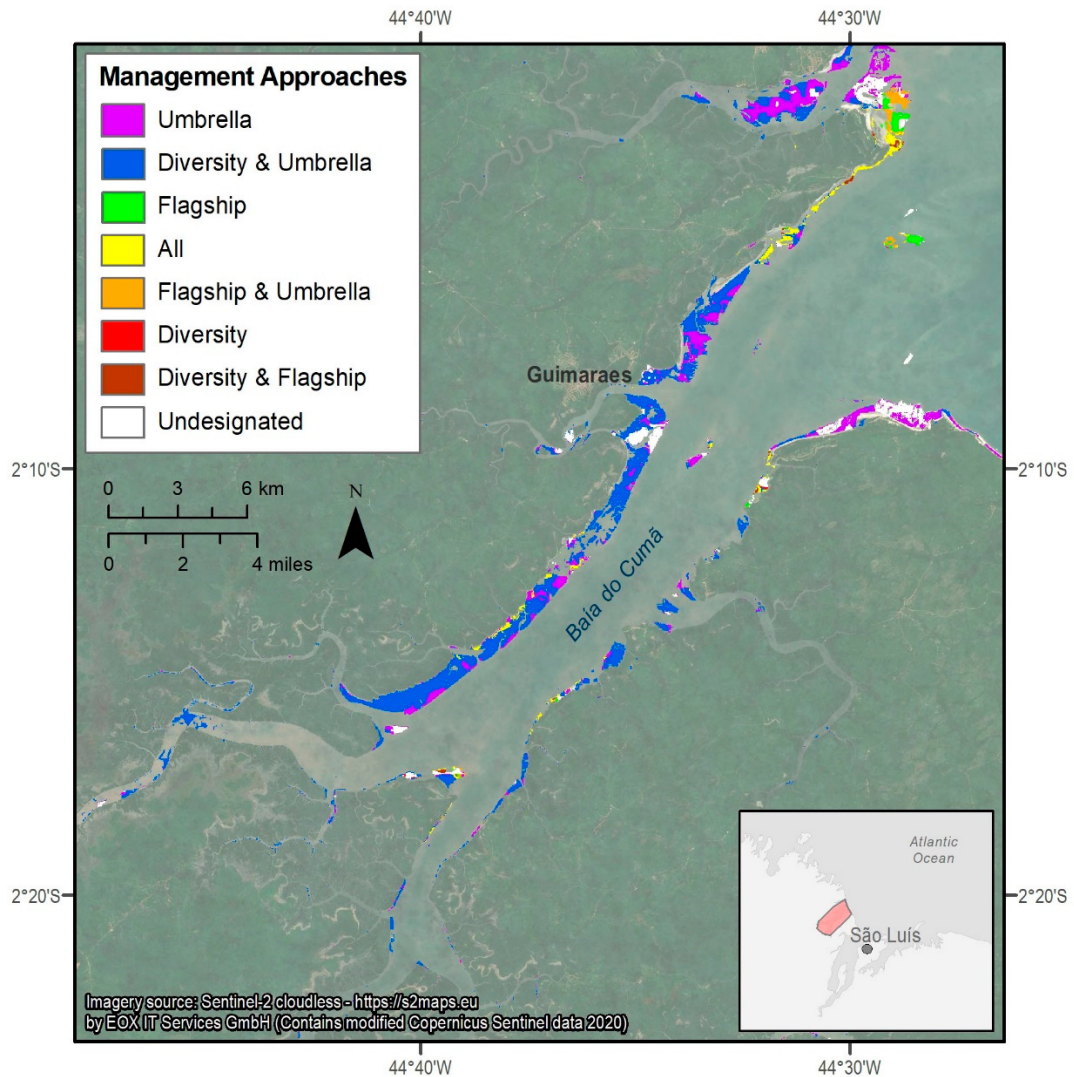

**Figure S1.** Map of potential conservation zone, Baía do Cumã, located between the municipalities of Guimaraes and Alcantara in the state of Maranhão. Inset map in the bottom right shows approximate location of Baía do Cumã relative to the Maranhão state capital, São Luís. Imagery Source: Copernicus Sentinel 2 cloudless mosaic <https://s2maps.eu> by EOX IT services GmbH.

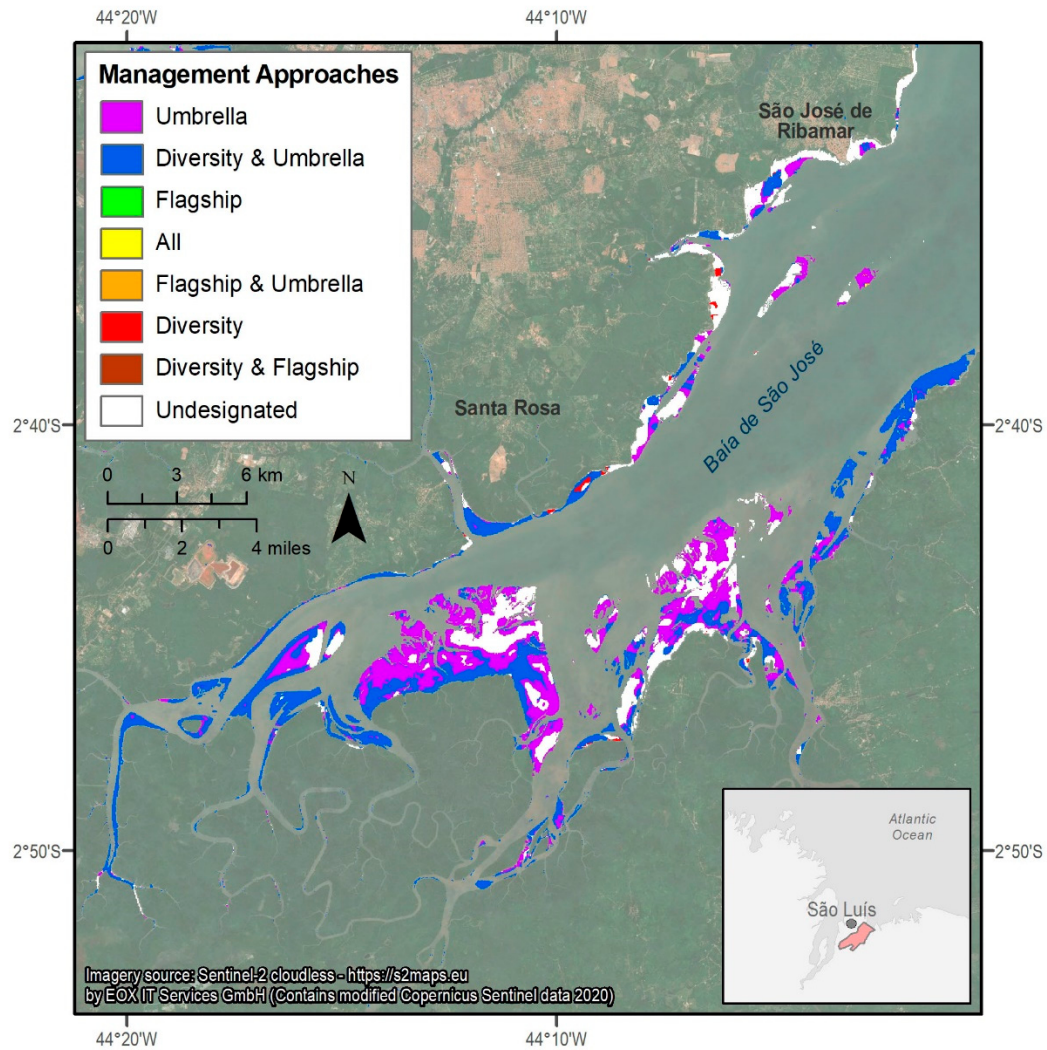

**Figure S2.** Map of potential conservation zone, Baía de São José, located to the southeast of the state capital of Maranhão, São Luís. Inset map in the bottom right shows approximate location of Baía de São José relative to São Luís. Imagery Source: Copernicus Sentinel 2 cloudless mosaic <https://s2maps.eu> by EOX IT services GmbH.
